# Supplementary material for: Enhanced CO capture properties of Li2MnO3via inducing layered to spinel transition by cation doping with Fe, Co, Ni and Cu
Source: Royal Society of Chemistry journal article supplement (doi:10.1039/d2re00064d), 2022-01-01
Supplement: d2re00064d1.pdf [file d2re00064d1.pdf]

## Enhanced CO capture properties of $\text{Li}_2\text{MnO}_3$ via inducing layered to spinel transition by cation doping with Fe, Co, Ni and Cu

Carlos Hernández-Fontes and Heriberto Pfeiffer

### Supplementary information

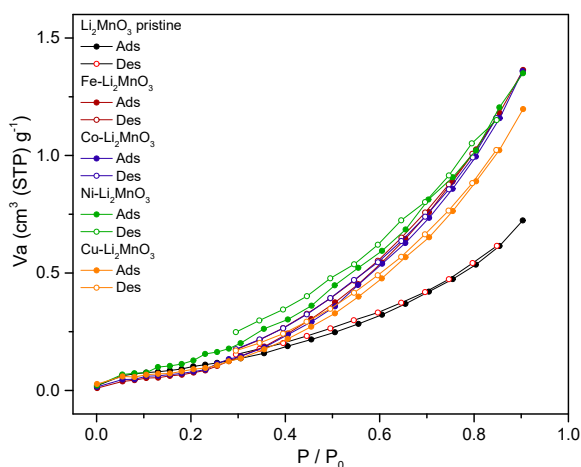

Figure S1.  $\text{N}_2$  adsorption-desorption isotherms of the  $\text{Li}_2\text{MnO}_3$  pristine sample and solid solution samples.

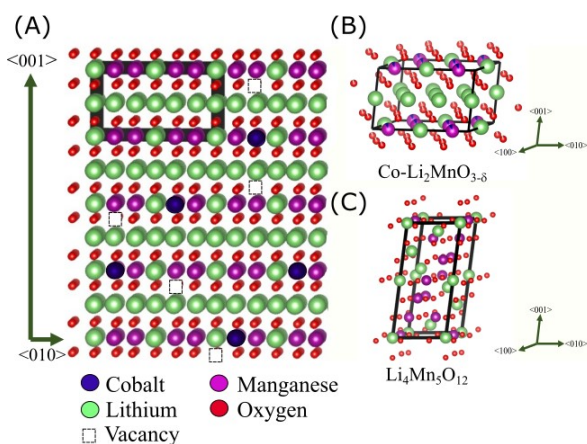

Figure S2. Schematic representations of the Co-doping effect in  $\text{Li}_2\text{MnO}_3$  where the anionic vacancies can be elucidated (A), as well as the crystal structures of  $\text{Co-Li}_2\text{MnO}_3$  (B) and  $\text{Li}_4\text{Mn}_5\text{O}_{12}$  (C).
